# Supplementary material
Source: PubMed Central journal article supplement (PMC7205443)
Supplement: NIHMS1556674-supplement-Supplement.pdf [file NIHMS1556674-supplement-Supplement.pdf]

## **SUPPLEMENTAL MATERIAL**

### *Measurement of Left Ventricular Volume and Ejection Fraction by Radionuclide*

#### *Techniques and Echocardiography*

Radionuclide ventriculography was performed at baseline, 3, and 12 months. Patient blood samples were labeled with  $^{99m}\text{TcO}_4$ , using the Ultratag (Mallinckrodt Pharmaceuticals, Dublin, Ireland) labeling technique. Labeled red blood cells were re-injected during dynamic first pass image acquisition to obtain right ventricular ejection fraction. Gated tomographic single-photon emission computed tomographic (SPECT) imaging was performed (Prism 3000, Picker International, Cleveland OH or dual head Siemens E-CAM, Hoffman Estates, IL) and analyzed using a 4DMPECT angiographic analysis package (INVIA, Ann Arbor MI). When SPECT could not be performed, LVEF was determined by clinical multi-gated acquisition. As a secondary indicator of LV remodeling and for screening purposes, left ventricular internal systolic and diastolic dimensions were measured at the mitral valve leaflet tips in the parasternal short axis view using M-mode echocardiography in accordance with American Society of Echocardiography recommendations.

#### *RNA Extraction from Endomyocardial Biopsy Material*

Biopsy specimens were immediately frozen in liquid nitrogen and stored at  $-80^\circ\text{C}$ . All specimens from the same patient were processed together. {Lowes 2002} RNA was extracted from 10-15 mg of tissue using a motorized homogenizer and a guanidinium thiocyanate-phenol-chloroform reagent followed by affinity column-based purification and enzyme-based genomic DNA/protein removal. RNA mass was calculated from the absorbance at 260 nm ( $A_{260}$ ) using spectrophotometry,

and purity was inferred from the A260:A280 ratio. Purified RNA was aliquoted and stored at -80° C.

#### *Reverse Transcription-Quantitative Polymerase Chain Reaction*

First-strand cDNA was synthesized from 4.0 µg of total RNA using random primers (High Capacity Reverse Transcription Kit, ABI). Resultant cDNA pools were aliquoted for TaqMan fluorescent RT-qPCR and stored at -80° C. Assays for all candidate genes were run on an ABI 7300 in 96-well plates. All samples for each patient were assayed on the same plate for any individual gene, and each plate included *GAPDH* and *18s rRNA* as reference controls. Primers were designed using ABI Primer Express Software (v. 1.0 and 3.0, see Supplement) and either tested for amplification efficiency on an ABI 7300 or ordered as Pre-Designed Assays (reference control genes). Data files were analyzed using ABI 7300 Software (v. 2.0.6) to verify baseline and threshold cycle ( $C_t$ ) detection.

#### *mRNA Measurements by Microarray*

cDNAs were subjected to chemical/enzymatic fragmentation (FL-Ovation® cDNA Biotin Module V2, NuGEN Technologies). Single-stranded 50-100 nucleotide fragments were labeled with a 3' biotin-labeled nucleotide, and approximately 3.75 µg of nucleotide fragments were hybridized to the Affymetrix HG-U133 Plus 2.0 Human Expression GeneChip after dilution into 200 µL of Affymetrix Hybridization Cocktail (Hybridization Buffer, DMSO and control oligonucleotides) for 16-20 hours

at 45°C. The GeneChip was washed, stained with streptavidin-phycoerythrin, and read at a resolution of 6 microns with a Hewlett-Packard Gene Array Scanner.

## RT-qPCR primers for candidate (n=50) and reference (n=2) genes

| Symbol        | Gene Name                                                                   | Forward Primer                                                                 | Reverse Primer            | FAM Probe                             |
|---------------|-----------------------------------------------------------------------------|--------------------------------------------------------------------------------|---------------------------|---------------------------------------|
| <i>ADRB1</i>  | Adrenergic receptor $\beta$ 1                                               | CTTCATCATGTCCCTGGC                                                             | AACGGCACCCACAGCA          | AGCGCCGACCTGGTCATGG                   |
| <i>ADRB2</i>  | Adrenergic receptor $\beta$ 2                                               | AGCCCTCAAGACGTTAGG                                                             | AGGTTATCTCGGATCACATG      | ATCATCATGGGCACTTTCACCCT               |
| <i>HNRNPB</i> | Heterogeneous nuclear ribonucleoprotein D (AUF-1)                           | GCGAAGATTGACGCCAGTAAG                                                          | TCTTTCTTTGTAGTGTCCAGCTAAG | ACGAGGAGGATGAAGGGAAATGTTTATAGGAG      |
| <i>ADRBK1</i> | beta adrenergic receptor kinase 1 (BARK1, GRK2)                             | CTTCGTGGTCTACCGGGAC                                                            | CGCACGTGGCCATGC           | AAGCCAGCCAACATCCTTCTGGACG             |
| <i>GNAS</i>   | GNAS complex locus (alpha subunit Gs)                                       | GCGATGAACGCCGCA                                                                | GCCACCACGAAGATGATGG       | TGGATCCAGTGTCAACGATGTGACT             |
| <i>GNAI2</i>  | G protein, $\alpha$ inhibiting activity polypeptide 2 ( $G_{\alpha i2}$ )   | CGCCGTCACCGATGTCA                                                              | AAAGTCGGCGGTGGCC          | CATCAAGAACAACCTGAAGGACTGCGG           |
| <i>ADCY5</i>  | Adenylate cyclase 5                                                         | GGAGGCTGGCGCAA                                                                 | GTCCCAATTCAGGTAGTTGATG    | AGGACGCATCCACATCAACAGGCT              |
| <i>ADRA1A</i> | Adrenergic receptor $\alpha$ 1A                                             | GCTGGTGCCTTTTTCTTAGTC                                                          | AAAAAATGTTTTAGAGGGCTTGA   | TGCCATTGGGCTTTTCTCCCTGAT              |
| <i>GNAQ</i>   | G protein, $q$ polypeptide ( $G_{\alpha q}$ )                               | CCCCACCACAGGGATCATC                                                            | TTTGCCCCCTACATCGA         | AATACCCCTTGACTACAAAGTGTCAATTTTCAGAATG |
| <i>PRKCB</i>  | Protein kinase C, $\beta$                                                   | TCGGGAAGCAGGGATTCC                                                             | AAATTCATGGCACCCGCTTG      | TGCCAAGTTTGTGCTTTGTGGTGC              |
| <i>SLC9A1</i> | Solute carrier family 9, (sodium/hydrogen exchanger), member 1              | TCCCTAGATCCAGGCTTCTC                                                           | GATTTGGTCTGAATGAGGAGGA    | ACCTGGACTAGGGCTCGGAGG                 |
| <i>ACE</i>    | Angiotensin I converting enzyme (peptidyl-dipeptidase A) 1                  | CGAGTACAACCTGGACGCCGAAAC                                                       | GGCCTGTGCCCATCC           | CCGCTCGCTCAGAAGGGC                    |
| <i>AGT</i>    | Angiotensinogen                                                             | CTCAACTGGATGAAGAACTGTCT                                                        | CATAAGATCCTTGCAGCACC      | CCGGACCATCCACTGACCATG                 |
| <i>AGTR1</i>  | Angiotensin II receptor, type 1                                             | AAATGGCTGGTTTTTATCTGAATA                                                       | TTTTGATCACCTGGTTCGAATT    | ATGCCATCCAGAAAGTCGGCACC               |
| <i>EDN1</i>   | Endothelin 1                                                                | ACCTGGACATCATTGGGTCA                                                           | TGGACCTAGGGCTTCCAAGTC     | CACTCCGAGCAGTGTGTTCCGCT               |
| <i>HK2</i>    | Hexokinase 2                                                                | GGCTCAAGACAAGGGGCA                                                             | GATGGCTCGGACTTGCAG        | AAGTTCTTGTCTCAGATTGAGAGTGACTGCSTG     |
| <i>PFKM</i>   | Phosphofructokinase, muscle                                                 | GAGGGCTCTGGTCTTCCAAC                                                           | TGTTCTTGGGGATTTCGATG      | CTGAGCTGAAGGACAGACAGATTTTGA           |
| <i>PDK4</i>   | Pyruvate dehydrogenase kinase, isozyme 4                                    | TCCACTGCACCAACGCTT                                                             | GCAAGCCGTAACCAAAACCA      | ATGGATAATTCGCGAATGCTCCTTTGG           |
| <i>PDHX</i>   | Pyruvate dehydrogenase complex, component X                                 | AGTTAGGCAAGATCTGGTCAAAG                                                        | CCTCTCCATCCCAGCTTACA      | CAGCTGTATCCCTAAACAAATGCCAGATG         |
| <i>CPT1B</i>  | Carnitine palmitoyltransferase 1B                                           | CATTGCTGATCTTTTCCAAG                                                           | GGGCAGCTGGCATT            | CCCAAGGCCTACAGTGAAGGTTG               |
| <i>ATP2A2</i> | ATPase, $Ca^{++}$ transporting, cardiac muscle, slow twitch 2 (Serca 2a)    | CCAGTGGCTGATGGTGTCT                                                            | ACTTGAAGGCTCTATCCATG      | AAAATCTCTTGGCCGTGATTC                 |
| <i>PLN</i>    | Phospholamban                                                               | CACAATACTCTACTGTGATGATCACAG                                                    | AAAGCTGGCAGCCAAATATG      | TGCCAAGGCTACCTAAAAGAGACAGT            |
| <i>RYR2</i>   | Ryanodine receptor 2 (cardiac)                                              | TTCTTCTGCATCATTGGATACTACT                                                      | TTCCGTGCCACTTCCCTT        | TTGAAAGTCCCATTTGGTTATTTTTAAGCGA       |
| <i>CASQ2</i>  | Calsequestrin 2 (cardiac muscle)                                            | *Life Technologies (Carlsbad, CA) TaqMan Gene Expression Assay : Hs00904422_m1 |                           |                                       |
| <i>SLC8A1</i> | Solute carrier family 8 (sodium/calcium exchanger), member 1                | GCTGCACCATTTGGCCCTGA                                                           | CTGCCACTTTGTGGCAAA        | ACTGCAGTCGTGTTCTGTCGCACTTG            |
| <i>CANX</i>   | Calnexin                                                                    | *Life Technologies (Carlsbad, CA) TaqMan Gene Expression Assay : Hs00233492_m1 |                           |                                       |
| <i>MYH6</i>   | Myosin, heavy chain 6, cardiac muscle, alpha                                | TCGCTGAGTCCCAGGTCA                                                             | TCCTCATCGTGCATTTTTTG      | CCAAGAGCCGTGACATTGGTGCCA              |
| <i>MYH7</i>   | Myosin, heavy chain 7, cardiac muscle, beta                                 | TGACATTTGGCAGGAAGG                                                             | AGCTGTACACAGGCTCCAG       | CCTGGAGGTGCCAGCAAAGC                  |
| <i>ACTA1</i>  | actin, $\alpha$ 1, skeletal muscle                                          | GGCACCCAGCACCATGA                                                              | CCACACCGAGTATTTGCGCT      | ATCAAGATCATCGCCCCCGCCG                |
| <i>ACTC1</i>  | Actin, $\alpha$ 1, cardiac muscle                                           | CATCCAGGCAGTGTCTATCCC                                                          | ACCATCCCCAGAGTCCAGAAAC    | TATGCTTCTGGCCGTACCCAGGCA              |
| <i>MYL2</i>   | Myosin, light chain 2 (ventricular regulatory light chain 2)                | CGGGAGGCAGTGTGG                                                                | GCCCCGGCTCTCTTCT          | TCCTTTCCACCATGGCACCTAAGAAAGC          |
| <i>MYL3</i>   | Myosin, light chain 3 (ventricular essential light chain 1)                 | TGTCATGGGTGCTGAGCTTC                                                           | CCACTTCGTCTTCTGTGACGC     | CACGTGCTGGCCACGCTGG                   |
| <i>MYL4</i>   | Myosin, light chain 4 (atrial essential light chain 1)                      | ACATGGGTGCTGAGCTTCG                                                            | GCTCCACTTCAGCCTCAGTCA     | ACGTCTTGGCCACCTGGGAGAG                |
| <i>MYL7</i>   | Myosin, light chain 7, regulatory (MYLC2a, regulatory atrial light chain 2) | TCTTCTCACGCTCTTTGGG                                                            | GGAAGGCACTCAGGATGGC       | AAGCTCAATGGGACAGACCCCGAGG             |
| <i>TNNT2</i>  | Troponin T type 2 (cardiac)                                                 | TCTCCGAAACAGGATCAACGA                                                          | GCCCCGTGACTTTAGCCTTC      | AACCAGAAAGTCTCAAAGACCCCGC             |
| <i>TNNI3</i>  | Troponin I type 3 (cardiac)                                                 | CCAACTACCGCGCTTATGC                                                            | GCAATTTCTCGAGGCGGA        | ACGGAGCCGACGCCAAGA                    |
| <i>TNNC1</i>  | Troponin C type 1 (slow)                                                    | GCTGCAGGAGATGATCGA                                                             | CATCAAAGTCCACCGTGC        | AGGTGGACGAGGACGGCAGC                  |
| <i>DMD</i>    | Dystrophin                                                                  | GGACACAAGCACAGGGTTAGA                                                          | GGCTTCCAGGGGTATTTCTT      | AGGTGATGGAGCAACTCAACAACCTCT           |
| <i>NPPA</i>   | Natriuretic peptide A                                                       | AATCCCATGTACAATGCCGTG                                                          | TCTTCCAAATGGTCCAGCAAA     | CCAACGACACCTGATGGATTTCAAGA            |
| <i>NPPB</i>   | Natriuretic peptide B                                                       | ATGGTGCAAGGGTCTGGT                                                             | CTTAAATGCCGCTCAGCA        | CTTTGGGAGGAAGATGGACCCGGATCA           |
| <i>TR-a1</i>  | Thyroid hormone receptor, $\alpha$ , splice variant 1                       | CAGGCTGTGCTGCTAATGTCAA                                                         | TTTCAATGGGAGAAAGCGCT      | ACTGACCTCCGCTATGAT                    |
| <i>TR-a2</i>  | Thyroid hormone receptor, $\alpha$ , splice variant 2                       | CCCAAGCTGCTGATGAAG                                                             | CGCTGCCCTTGTGA            | AAGGAGAGAGAAGTGCAGAGTTCGATTCT         |
| <i>ERF</i>    | Ets2 repressor factor                                                       | TCTCTACAAGTGCTGCTATCCCTC                                                       | TGGGGATGAAGGGGTTGGA       | CCACTCCCCACCCAGCACCCG                 |
| <i>CSRP3</i>  | cysteine and glycine-rich protein 3 (cardiac LIM protein)                   | GAGAAGGTTATGGGAGGTGGCAA                                                        | GTTCCCACTTTTGTTCAGTGACA   | ACAAGACCTGTTCCGCTGTGCCATC             |
| <i>TNF</i>    | Tumor necrosis factor                                                       | ATCGGCCGACTATCTCGA                                                             | TCCTCACAGGGCAATGATCC      | TTTGCCGAGTCTGGGAGGTCTACTTT            |
| <i>IL1B</i>   | Interleukin 1, $\beta$                                                      | AATCTGTACCTGTCTGCGTG                                                           | TGGGTAATTTTTGGGATCTACT    | TGAAAGATGATAAGCCCACTCTACAGCTGG        |
| <i>CTF1</i>   | Cardiotrophin 1                                                             | CACCAAATACGCTGAGCAG                                                            | CAGCCCCAAGGGGTC           | TGCTCCAGGAATATGTGCAGCTCC              |
| <i>IL6</i>    | IL6 interleukin 6 (interferon, beta 2)                                      | GCTGTGCAGATGAGTACAAAA                                                          | TTATTGCATCTAGATTCTTTGC    | TCCTGATCCAGTCTCGAGAA                  |
| <i>IL6ST</i>  | Interleukin 6 signal transducer (gp130)                                     | GCCCTGAATCCATAAAGGCA                                                           | CCCTACTTTTTTGTCCGAACAGT   | CCTTAAACAAGCTCCACCTTCAAAGGACC         |
| <i>NOS2</i>   | Nitric oxide synthase 2, inducible                                          | CCTTTACTTGACCTCCTAACAAGTAGC                                                    | AGGGAGGCCCAAGTTTGA        | CCCTGGATTGATCGGAGCTCCTC               |
| <i>GAPDH</i>  | Glyceraldehyde-3-phosphate dehydrogenase                                    | *Life Technologies (Carlsbad, CA) TaqMan Gene Expression Assay : Hs99999905_m1 |                           |                                       |
| <i>RN18S1</i> | RNA, 18S ribosomal 1                                                        | *Life Technologies (Carlsbad, CA) TaqMan Gene Expression Assay : Hs99999901_s1 |                           |                                       |
